# Supplementary material for: Long-Term Monitoring of Cardiac Involvement under Migalastat Treatment Using Magnetic Resonance Tomography in Fabry Disease
Source: MDPI journal article supplement (doi:10.3390/life13051213), 2023-05-19
Supplement: s1 [file s1]

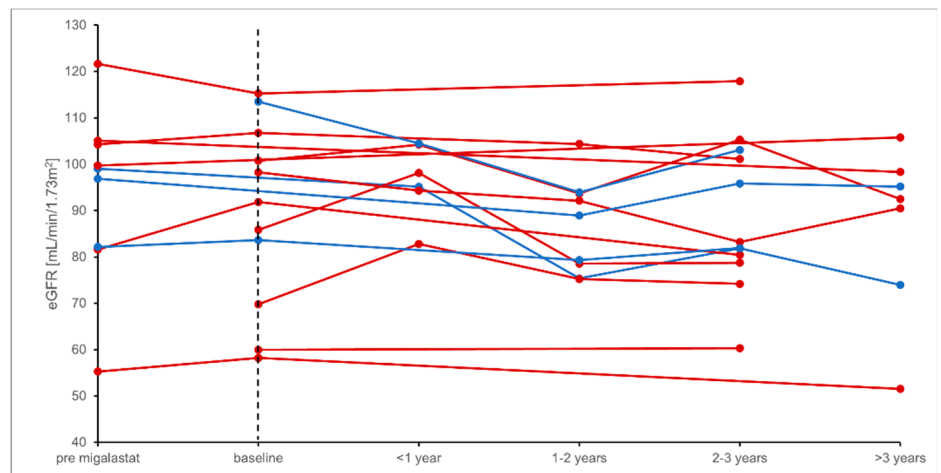

**Supplementary Figure S1.** Individual courses of eGFR males (blue) compared to female patients (red) eGFR, estimated glomerular filtration rate. Baseline = "treatment start".
